# Supplementary material for: Prognostic Significance of PD-L1+ and CD8+ Immune Cells in HPV+ Oropharyngeal Squamous Cell Carcinoma
Source: Oxford University Press journal article supplement (doi:10.1158/2326-6066.cir-17-0299), 2018-01-29
Supplement: 23266066cir170299-sup-184572_2_supp_4459126_p1727v.docx [file 23266066cir170299-sup-184572_2_supp_4459126_p1727v.docx]

Supplementary Figure 3 - CONSORT diagram

**FFPE blocks or unstained slides +**

**clinicopathological and outcome data for**

**355 OPSCC patients**

1/355 = no result

152/355 = p16 negative

**p16 immunohistochemistry**

**202/355 = p16 positive**

1/202 = died prior to treatment

11/202 = palliative

**Treatment intent**

**190/202 = curative**
